# Supplementary material
Source: PubMed Central journal article supplement (PMC9780154)
Supplement: NIHMS1828573-supplement-3.pdf [file NIHMS1828573-supplement-3.pdf]

**Figure S1.** Effect of Exercise training vs. health education on performance on Timed Up and Go and Short Physical Performance Battery tests.

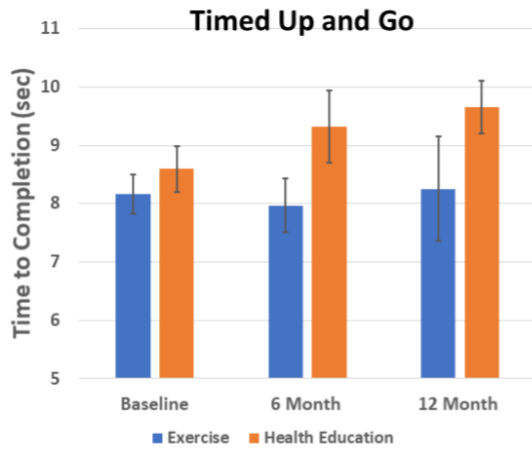

**Treatment-by-time Interaction: p=0.04**

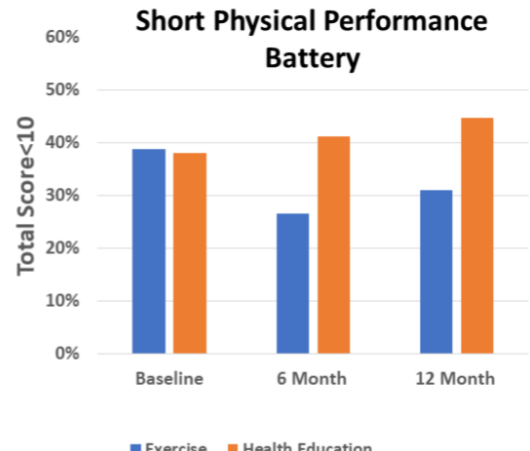

**Treatment-by-time Interaction: p=0.3**

**Table S1-** characteristics of participants with and without 12-month functional outcome measures, by randomized group.

| Characteristic                       | Randomized to Exercise                                |                                                         | Randomized to Health Education                        |                                                         |
|--------------------------------------|-------------------------------------------------------|---------------------------------------------------------|-------------------------------------------------------|---------------------------------------------------------|
|                                      | Complete 12-month functional outcome measures* (N=30) | No complete 12-month functional outcome measures (N=19) | Complete 12-month functional outcome measures* (N=38) | No complete 12-month functional outcome measures (N=12) |
| Age (years)                          | 68.4 (6.6)                                            | 67.1 (9.2)                                              | 67.2 (8.3)                                            | 70.8 (9.8)                                              |
| Female                               | 9 (30%)                                               | 6 (31.5%)                                               | 8 (21%)                                               | 2 (17%)                                                 |
| Race                                 |                                                       |                                                         |                                                       |                                                         |
| African American                     | 15 (50%)                                              | 12 (63%)                                                | 26 (68%)                                              | 8 (67%)                                                 |
| Caucasian                            | 13 (43%)                                              | 5 (26%)                                                 | 11 (29%)                                              | 2 (17%)                                                 |
| Other                                | 2 (7%)                                                | 2 (1%)                                                  | 1 (3%)                                                | 2 (17%)                                                 |
| eGFR (ml/min/1.73m <sup>2</sup> )    | 35.5 (9.0)                                            | 31.8 (10.1)                                             | 34.2 (12.2)                                           | 27.4 (6.2)                                              |
| BMI (kg/m <sup>2</sup> )             | 29.8 (7.0)                                            | 31.1 (7.6)                                              | 32.0 (6.4)                                            | 31.1 (3.8)                                              |
| CAD                                  | 8 (27%)                                               | 8 (42%)                                                 | 9 (24%)                                               | 4 (33%)                                                 |
| Diabetes                             | 17 (57%)                                              | 13 (68%)                                                | 21 (55%)                                              | 7 (58%)                                                 |
| Hypertension                         | 27 (90%)                                              | 17 (89.5%)                                              | 37 (97%)                                              | 11 (92%)                                                |
| CHF                                  | 2 (7%)                                                | 4 (21%)                                                 | 2 (5%)                                                | 2 (17%)                                                 |
| Peripheral vasc disease <sup>2</sup> | 0 (0%)                                                | 3 (16%)                                                 | 4 (10.5%)                                             | 2 (17%)                                                 |
| Smoking                              |                                                       |                                                         |                                                       |                                                         |
| Current                              | 6 (20%)                                               | 4 (21.1%)                                               | 4 (11%)                                               | 2 (17%)                                                 |
| Former                               | 16 (53%)                                              | 12 (63%)                                                | 23 (61%)                                              | 7 (58%)                                                 |
| Never                                | 8 (27%)                                               | 3 (16%)                                                 | 11 (29%)                                              | 3 (25%)                                                 |
| Stroke or TIA                        | 6 (20%)                                               | 3 (16%)                                                 | 6 (16%)                                               | 1 (8%)                                                  |
| COPD                                 | 3 (10%)                                               | 2 (11%)                                                 | 6 (16%)                                               | 2 (17%)                                                 |

\*Non-missing values for VO<sub>2</sub>peak and/or 6-minute walk test distance at 12 months)

CAD: Coronary Artery Disease; CHF: Congestive Heart Failure; COPD: Chronic Obstructive Pulmonary Disease; TIA: Transient Ischemic Attack

**Table S2: Change in physical function, by randomization group**

| <b>Outcome (Primary*)</b>         | <b>Timing</b> | <b>Exercise</b>    | <b>Education</b>   | <b>between-group difference<sup>^</sup></b> |
|-----------------------------------|---------------|--------------------|--------------------|---------------------------------------------|
| VO <sub>2</sub> peak* (ml/kg/min) | Baseline      | 17.1 (5.3)<br>N=48 | 16.8 (5.6)<br>N=50 | --                                          |
|                                   | 6-month       | 17.9 (5.5)<br>N=32 | 15.9 (7.0)<br>N=32 | 1.9<br>p=0.03                               |
|                                   | 12-month      | 18.7 (5.2)<br>N=25 | 17.2 (6.4)<br>N=37 | 0.5<br>p=0.7                                |
| 6-minute walk* (feet)             | Baseline      | 1298 (323)<br>N=49 | 1251 (394)<br>N=50 |                                             |
|                                   | 6-month       | 1649 (620)<br>N=35 | 1247 (454)<br>N=37 | 81.5<br>p=0.047                             |
|                                   | 12-month      | 1453 (368)<br>N=29 | 1284 (462)<br>N=37 | 97.7<br>p=0.02                              |
| Timed Up and Go (secs)            | Baseline      | 8.2 (2.4)<br>N=49  | 8.6 (2.7)<br>N=49  |                                             |
|                                   | 6-month       | 8.0 (2.6)<br>N=34  | 9.3 (3.6)<br>N=33  | -0.12<br>p=0.02                             |
|                                   | 12-month      | 8.3 (4.8)<br>N=29  | 9.0 (2.9)<br>N=36  | -0.16<br>p=0.02                             |
| SPPB - N(%)<br><10 total score    | Baseline      | 19 (39%)           | 19 (38%)           | --                                          |
|                                   | 6-month       | 9 (34%)            | 15 (41%)           | p=0.4                                       |
|                                   | 12-month      | 9 (31%)            | 16 (45%)           | p=0.7                                       |

<sup>^</sup>From ANCOVA or logistic models adjusting for baseline function

**Table S3: Change in renal function and cardiovascular risk factors, by randomization group**

| Outcome                           | Timing (N complete) | Exercise  | Education | between-group difference* | Difference in change over time <sup>‡</sup> |
|-----------------------------------|---------------------|-----------|-----------|---------------------------|---------------------------------------------|
| HbA1C (%)                         | Baseline (N=99)     | 6.7±1.2   | 6.7±1.8   | --                        | p=0.9                                       |
|                                   | 6-month (n=72)      | 6.5±1.1   | 7.0±1.7   | p=0.5                     |                                             |
|                                   | 12-month (n=66)     | 6.9±1.5   | 6.8±1.7   | p=0.3                     |                                             |
| BMI (kg/m <sup>2</sup> )          | Baseline (N=99)     | 30.3±7.2  | 31.8±5.8  |                           | p=0.5                                       |
|                                   | 6-month (n=84)      | 27.9±9.7  | 28.6±9.9  | p=0.8                     |                                             |
|                                   | 12-month (n=76)     | 26.6±10.1 | 29.9±9.2  | p=0.6                     |                                             |
| SBP (mm Hg)                       | Baseline (n=99)     | 133±20    | 135±22    |                           | p=0.6                                       |
|                                   | 6-month (n=72)      | 131±19    | 132±24    | p=0.9                     |                                             |
|                                   | 12-month (n=67)     | 134±20    | 129±18    | p=0.4                     |                                             |
| DBP (mm Hg)                       | Baseline (N=99)     | 72±12     | 72±10     | --                        | p=0.6                                       |
|                                   | 6-month (n=72)      | 72±11     | 71±12     | p=0.4                     |                                             |
|                                   | 12-month (n=67)     | 72±9      | 71±10     | p=0.7                     |                                             |
| UACR (mg/g Cr)                    | Baseline (N=99)     | 53±94     | 62±86     |                           | p=0.8                                       |
|                                   | 6-month (n=69)      | 45±69     | 60±84     | p=0.4                     |                                             |
|                                   | 12-month (n=67)     | 45±68     | 79±145    | p=0.2                     |                                             |
| eGFR (ml/min/1.73m <sup>2</sup> ) | Baseline (n=99)     | 34.1±9.5  | 32.6±11.4 | --                        | p=.09                                       |
|                                   | 6-month (n=72)      | 33.9±10.7 | 33.1±11.5 | p=0.5                     |                                             |
|                                   | 12-month (n=67)     | 34.9±7.6  | 30.8±13.8 | p=0.4                     |                                             |

\* ANCOVA model adjusting for baseline values. <sup>‡</sup>From linear mixed models, test of treatment-by-time interaction
